# Supplementary material for: Tailoring Mobile Data Collection for Intervention Research in a Challenging Context: Development and Implementation in the Malakit Study
Source: PubMed Central journal article supplement (PMC9247814; doi:10.2196/29856), 2022-06-16

**Malakit**  
**CRF Facilitator - First visit**  
Workflow v5

12/06/2018

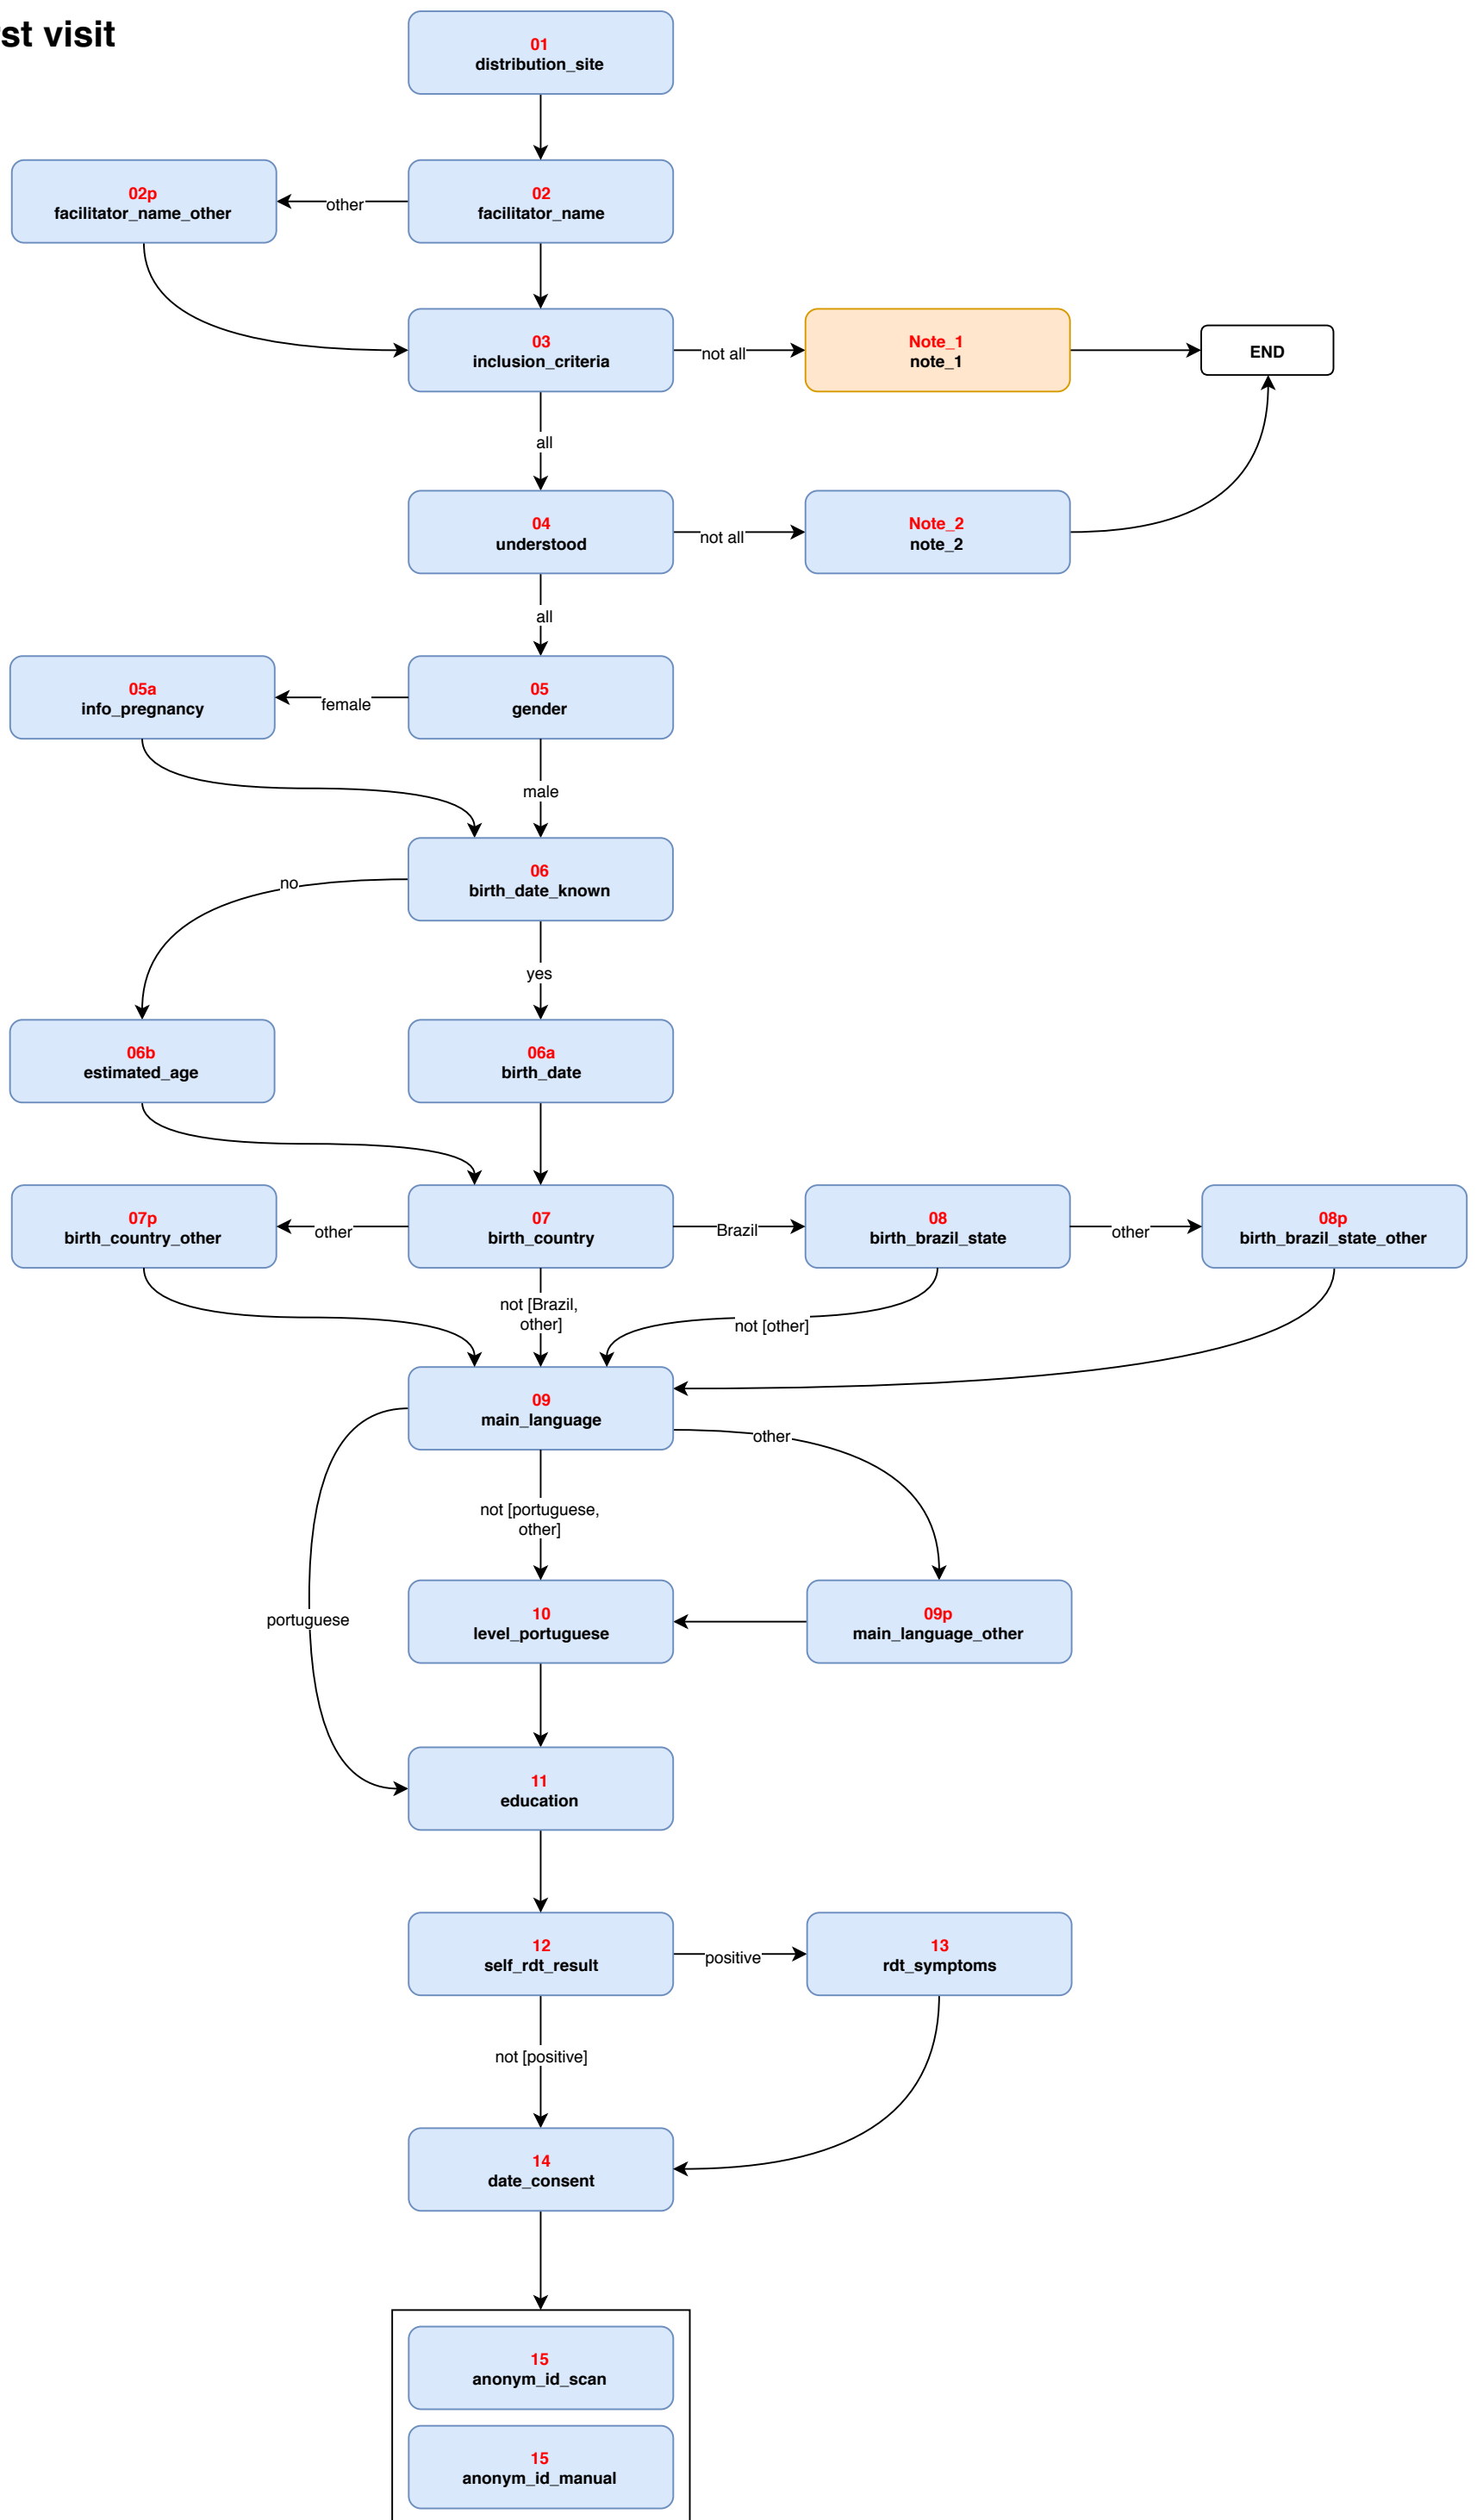

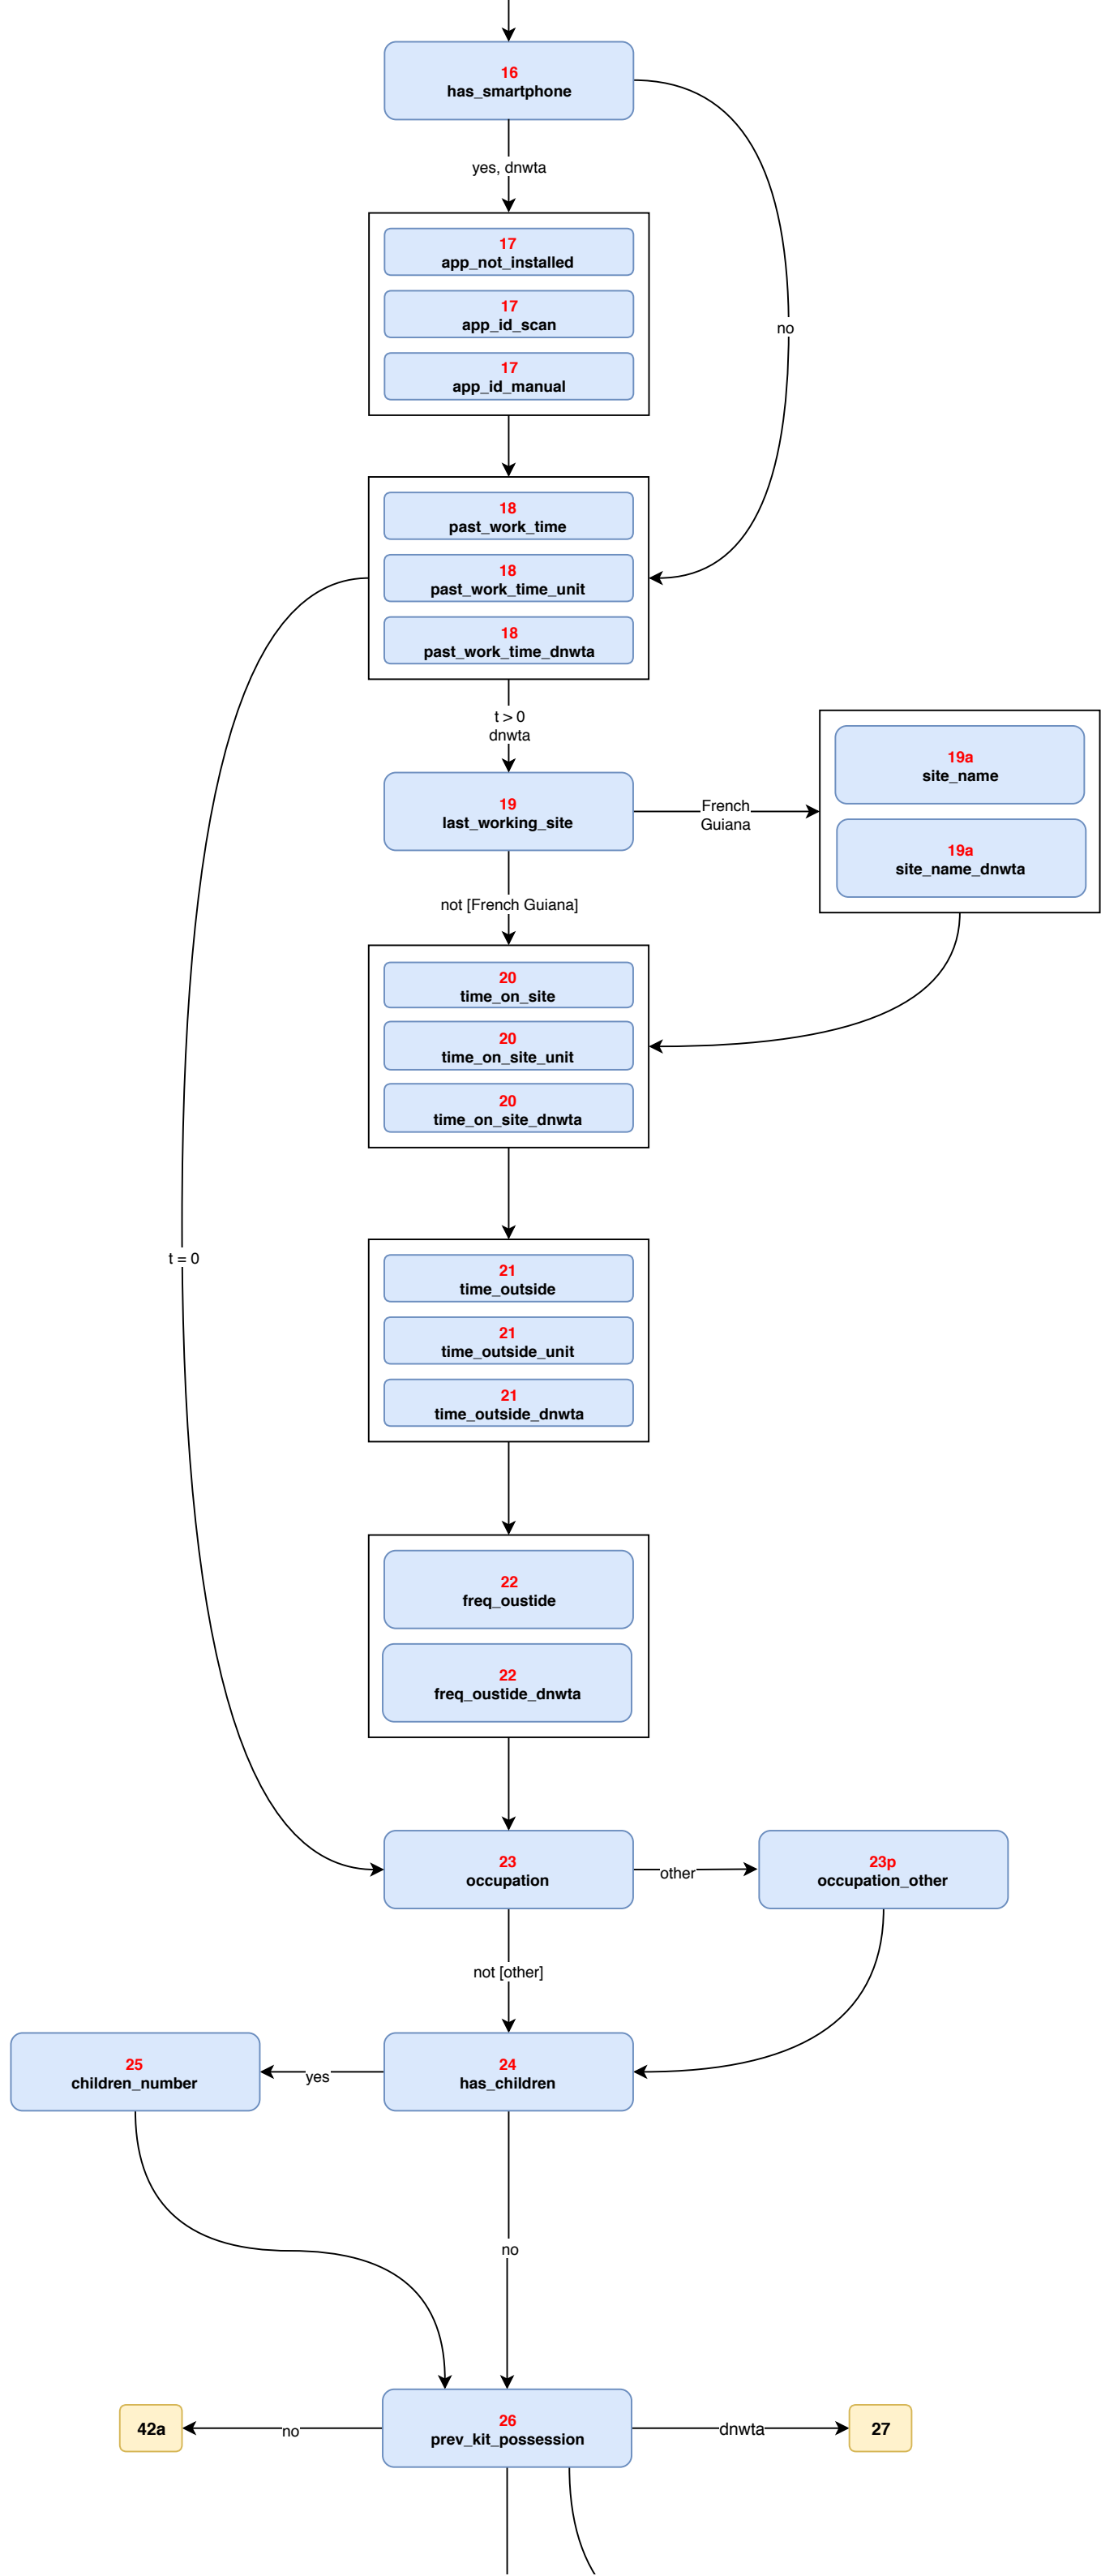

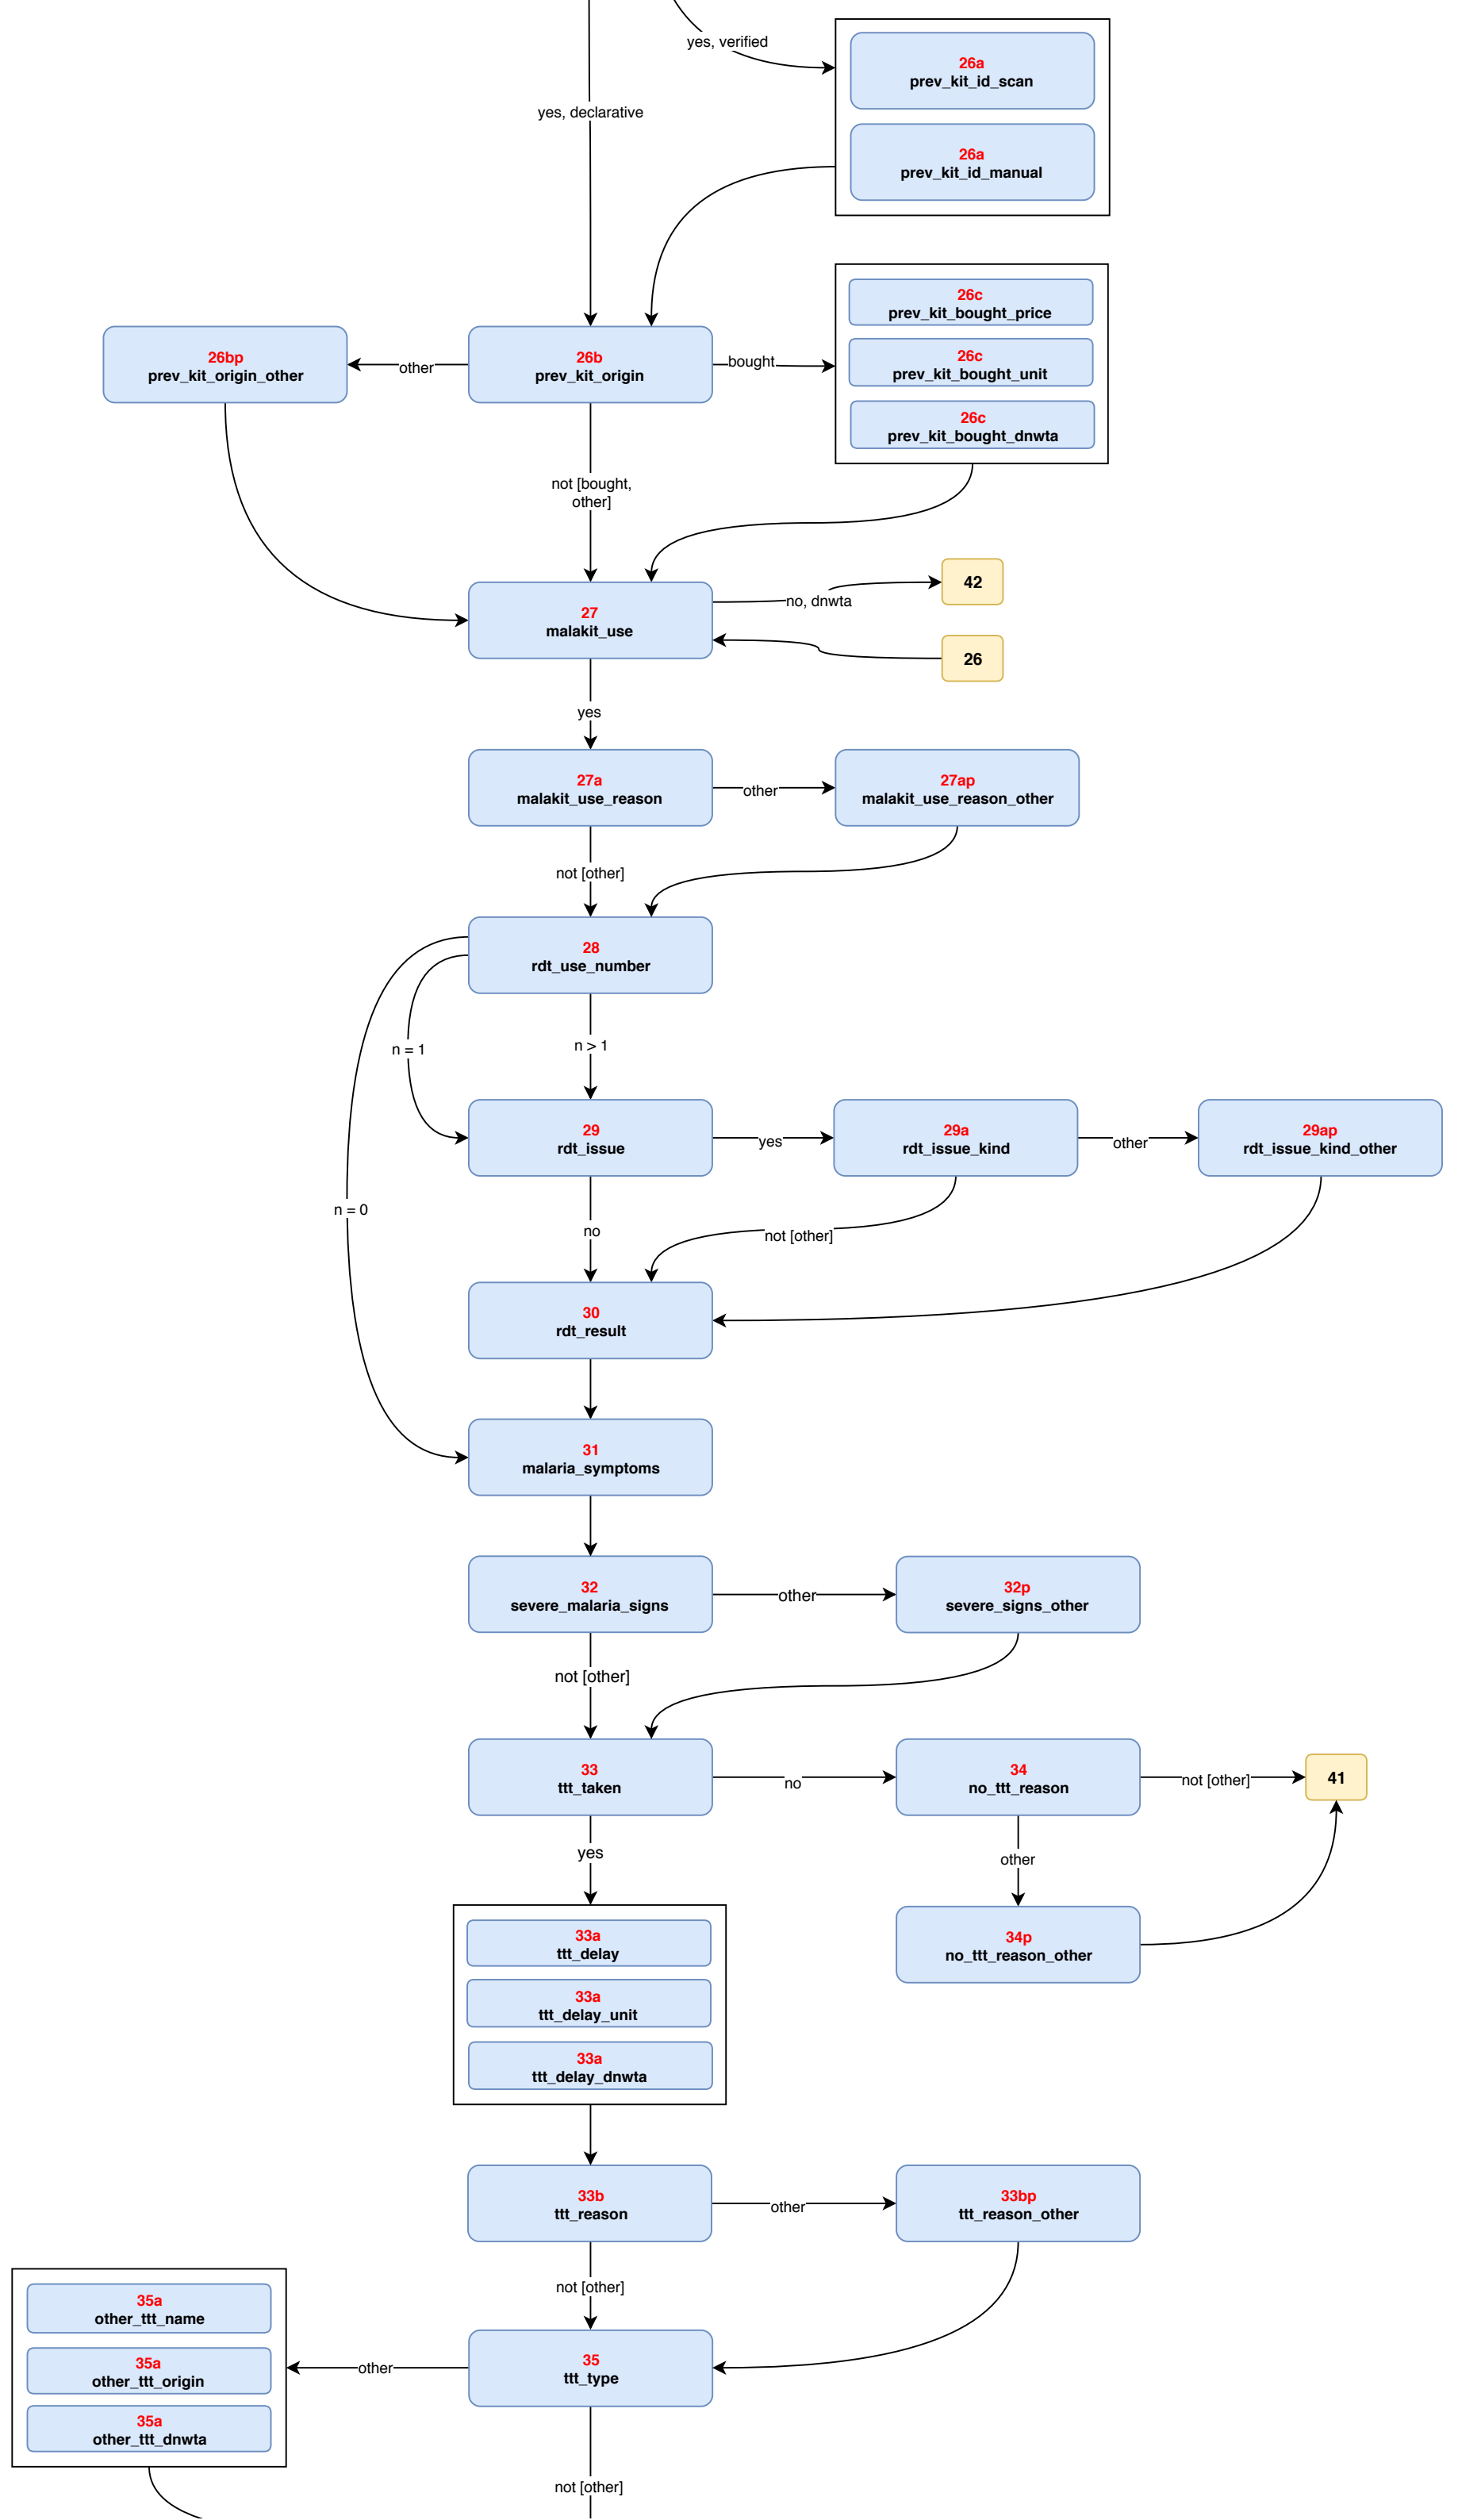

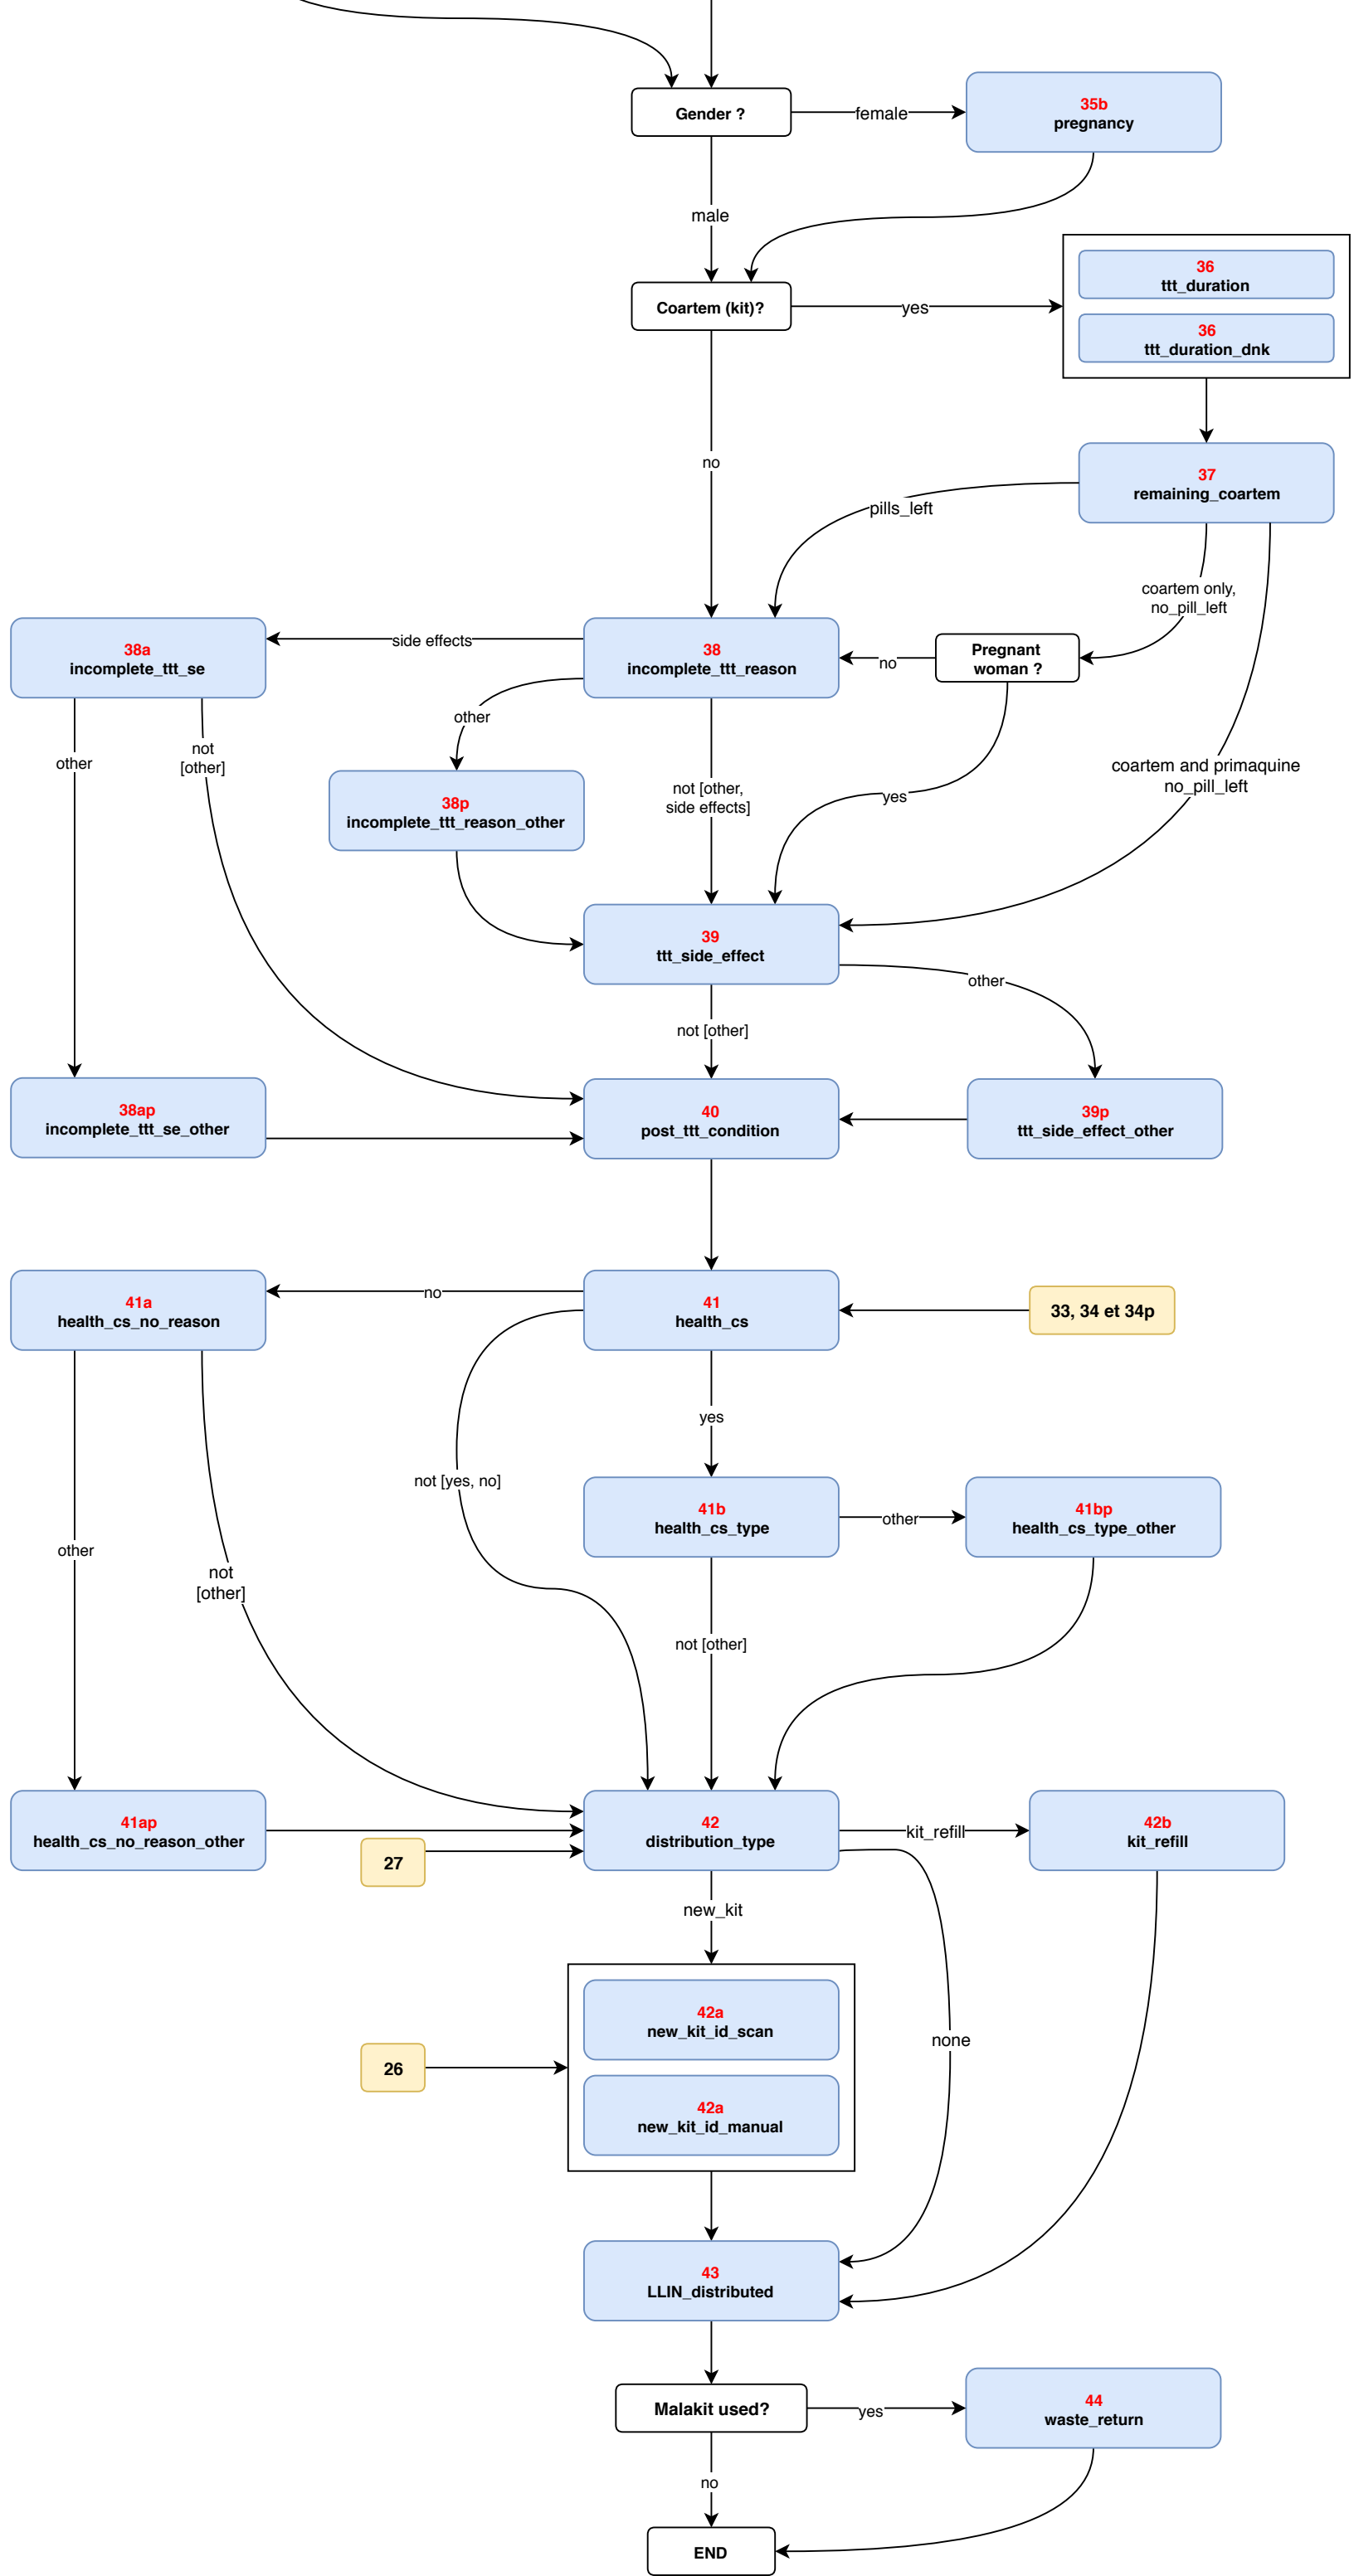

Supplement: formative_v6i6e29856_app1.pdf [file formative_v6i6e29856_app1.pdf]
